# Supplementary material for: A Comparative Analysis of Lipid Digestion in Human Milk and Infant Formulas Based on Simulated In Vitro Infant Gastrointestinal Digestion
Source: MDPI journal article supplement (doi:10.3390/foods11020200), 2022-01-12
Supplement: s1 [file s1]

**Table S1.** The composition of infant formulas.

| Sample | Main milk base        | Main source of fat                                                                                               | Source of Protein                            | Carbohydrate                                             | Vitamins                                        | Minerals                                                                                                                                                                                                                   |
|--------|-----------------------|------------------------------------------------------------------------------------------------------------------|----------------------------------------------|----------------------------------------------------------|-------------------------------------------------|----------------------------------------------------------------------------------------------------------------------------------------------------------------------------------------------------------------------------|
| IF1    | Skimmed milk powder   | Vegetable oil (Palm oil, rapeseed oil, coconut oil and sunflower oil), OPO, DHA, ARA                             | Whey protein powder                          | Galactool-igosaccharide, Fructool-igosaccharide          | Vitamins A, C, D, E, K1, B1, B2, B3, B5, B6, B7 | Na <sup>+</sup> , k <sup>+</sup> , Cu <sup>2+</sup> , Mg <sup>2+</sup> , Fe <sup>2+</sup> , Zn <sup>2+</sup> , Mn <sup>2+</sup> , Ca <sup>2+</sup> , P <sup>3+</sup> , I <sup>-</sup> , Cl <sup>-</sup> , Se <sup>4+</sup> |
| IF2    | Skimmed milk powder   | Vegetable oil (Palm oil, rapeseed oil, coconut oil and sunflower oil), OPO, DHA, ARA, MFGM                       | Desalted whey powder, Casein phosphopeptide, | Galactool-igosaccharide, Polydextrose                    | Vitamins A, C, D, E, K1, B1, B2, B3, B5, B6, B7 | Na <sup>+</sup> , k <sup>+</sup> , Cu <sup>2+</sup> , Mg <sup>2+</sup> , Fe <sup>2+</sup> , Zn <sup>2+</sup> , Mn <sup>2+</sup> , Ca <sup>2+</sup> , P <sup>3+</sup> , I <sup>-</sup> , Cl <sup>-</sup> , Se <sup>4+</sup> |
| IF3    | Raw milk              | Vegetable oil (Sunflower seed oil, rapeseed oil and coconut oil), Cream, OPO                                     | Desalted whey powder, Casein phosphopeptide  | Lactose, Fructool-igosaccharide                          | Vitamins A, C, D, E, K1, B1, B2, B3, B5, B6, B7 | Na <sup>+</sup> , k <sup>+</sup> , Cu <sup>2+</sup> , Mg <sup>2+</sup> , Fe <sup>2+</sup> , Zn <sup>2+</sup> , Mn <sup>2+</sup> , Ca <sup>2+</sup> , P <sup>3+</sup> , I <sup>-</sup> , Cl <sup>-</sup> , Se <sup>4+</sup> |
| IF4    | Raw milk              | Vegetable oil (Sunflower seed oil, rapeseed oil, walnut oil and coconut oil), Cream, OPO, DHA, ARA, Phospholipid | Desalted whey powder, Whey protein powder    | Lactose, Fructool-igosaccharide                          | Vitamins A, C, D, E, K1, B1, B2, B3, B5, B6, B7 | Na <sup>+</sup> , k <sup>+</sup> , Cu <sup>2+</sup> , Mg <sup>2+</sup> , Fe <sup>2+</sup> , Zn <sup>2+</sup> , Mn <sup>2+</sup> , Ca <sup>2+</sup> , P <sup>3+</sup> , I <sup>-</sup> , Cl <sup>-</sup> , Se <sup>4+</sup> |
| IF5    | Whole fat milk powder | Vegetable oil (Soybean oil, corn oil, coconut oil, sunflower oil and rapeseed oil), DHA, ARA                     | Desalted whey powder, Casein phosphopeptide  | Galactool-igosaccharide, Fructool-Igosaccharide, Lactose | Vitamins A, C, D, E, K1, B1, B2, B3, B5, B6, B7 | Na <sup>+</sup> , k <sup>+</sup> , Cu <sup>2+</sup> , Mg <sup>2+</sup> , Fe <sup>2+</sup> , Zn <sup>2+</sup> , Mn <sup>2+</sup> , Ca <sup>2+</sup> , P <sup>3+</sup> , I <sup>-</sup> , Cl <sup>-</sup> , Se <sup>4+</sup> |

**Table S2.** The content of differential fatty acids in IF1~IF5 before and after digestion.

| Types of fatty acids | Keep time<br>(min) | content (μmol/g fat)   |                       |                         |
|----------------------|--------------------|------------------------|-----------------------|-------------------------|
|                      |                    | 0 h                    | 2 h                   | 4 h                     |
|                      |                    | (before digestion)     | (gastric digestion)   | (intestinal digestion)  |
| IF1                  |                    |                        |                       |                         |
| C6:0                 | 6.749              | 0.19±0.07 <sup>c</sup> | 3.01±1.2 <sup>b</sup> | 5.48±0.77 <sup>a</sup>  |
| C8:0                 | 10.304             | 0.45±0.27 <sup>c</sup> | 2.9±1.42 <sup>b</sup> | 10.95±2.73 <sup>a</sup> |
| C10:0                | 13.293             | 0.7±0.66 <sup>c</sup>  | 9.98±6.1 <sup>b</sup> | 39.56±9.78 <sup>a</sup> |
| C11:0                | 14.632             | —                      | —                     | —                       |
| C12:0                | 15.895             | 0.85±0.5 <sup>c</sup>  | 6.41±4.8 <sup>b</sup> | 33.9±11.2 <sup>a</sup>  |

|                        |        |                         |                           |                            |
|------------------------|--------|-------------------------|---------------------------|----------------------------|
| C13:0                  | 17.089 | —                       | —                         | —                          |
| C14:1                  | 18.100 | 0.69±0.27 <sup>c</sup>  | 4.12±1.53 <sup>b</sup>    | 18.24±5.49 <sup>a</sup>    |
| C14:0                  | 18.221 | 3.27±0.73 <sup>c</sup>  | 28.34±8.91 <sup>b</sup>   | 120.5±14.14 <sup>a</sup>   |
| C15:1                  | 19.188 | —                       | —                         | —                          |
| C15:0                  | 19.299 | —                       | —                         | —                          |
| C16:1                  | 20.136 | —                       | —                         | —                          |
| C16:0                  | 20.339 | 6.99±2.36 <sup>c</sup>  | 48.96±8.38 <sup>b</sup>   | 166.23±49.27 <sup>a</sup>  |
| C17:1                  | 21.273 | 0.65±0.2 <sup>c</sup>   | 3.39±0.82 <sup>b</sup>    | 16.31±4.22 <sup>a</sup>    |
| C17:0                  | 21.514 | 0.51±0.15 <sup>c</sup>  | 3.06±1.33 <sup>b</sup>    | 12.51±5.37 <sup>a</sup>    |
| C18:3                  | 22.288 | 3.74±1.36 <sup>c</sup>  | 61.93±18.34 <sup>b</sup>  | 230.96±48.24 <sup>a</sup>  |
| C18:2n6t               | 22.511 | 1.02±0.32 <sup>c</sup>  | 25.41±8.93 <sup>b</sup>   | 125.85±18.95 <sup>a</sup>  |
| C18:2n6c               | 22.607 | 0.69±0.35 <sup>c</sup>  | 11.94±3.71 <sup>b</sup>   | 48.33±20.28 <sup>a</sup>   |
| C18:1                  | 22.680 | 2.40±1.12 <sup>c</sup>  | 37.31±14.33 <sup>b</sup>  | 144.69±33.27 <sup>a</sup>  |
| C18:0                  | 22.975 | 5.33±1.38 <sup>c</sup>  | 27.14±3.45 <sup>b</sup>   | 94.58±14.51 <sup>a</sup>   |
| C20:4n6                | 25.664 | —                       | 0.66±0.25 <sup>b</sup>    | 8.83±3.19 <sup>a</sup>     |
| C20:5n3                | 25.819 | —                       | —                         | —                          |
| C20:3n6/C20:3n3        | 26.07  | 0.26±0.05 <sup>c</sup>  | 37.18±6.5 <sup>b</sup>    | 172.03±41.85 <sup>a</sup>  |
| C20:2                  | 26.534 | 1.00±0.33 <sup>c</sup>  | 29.51±7.46 <sup>b</sup>   | 200.46±36.68 <sup>a</sup>  |
| C20:1                  | 26.665 | 0.85±0.40 <sup>c</sup>  | 9.6±2.98 <sup>b</sup>     | 51.04±11.33 <sup>a</sup>   |
| C20:0                  | 27.352 | 0.47±0.09 <sup>c</sup>  | 2.52±0.56 <sup>b</sup>    | 7.98±3.95 <sup>a</sup>     |
| C21:0                  | 30.708 | 0.28±0.12               | 1.5±0.55                  | 4.85±1.43                  |
| C22:6n3                | 31.666 | 0.2±0.07 <sup>c</sup>   | 1.54±0.94 <sup>b</sup>    | 6.07±2.58 <sup>a</sup>     |
| C22:2                  | 33.721 | 0.35±0.10 <sup>c</sup>  | 4.31±1.97 <sup>b</sup>    | 17.79±4.11 <sup>a</sup>    |
| C22:1n9                | 33.914 | —                       | 2.24±0.50 <sup>b</sup>    | 8.69±2.77 <sup>a</sup>     |
| C22:0                  | 35.22  | —                       | —                         | —                          |
| C23:0                  | 41.217 | —                       | —                         | —                          |
| C24:1                  | 44.554 | —                       | —                         | —                          |
| C24:0                  | 45.633 | —                       | —                         | —                          |
| Total free fatty acids |        | 30.99±3.78 <sup>c</sup> | 365.97±30.12 <sup>b</sup> | 1545.93±99.56 <sup>a</sup> |
| <b>IF2</b>             |        |                         |                           |                            |
| C6:0                   | 6.749  | 0.20±0.02 <sup>c</sup>  | 1.10±0.12 <sup>b</sup>    | 8.35±3.23 <sup>a</sup>     |
| C8:0                   | 10.304 | 0.50±0.18 <sup>c</sup>  | 2.94±1.48 <sup>b</sup>    | 22.50±7.05 <sup>a</sup>    |
| C10:0                  | 13.293 | 1.76±0.52 <sup>c</sup>  | 16.59±6.37 <sup>b</sup>   | 103.32±37.2 <sup>a</sup>   |
| C11:0                  | 14.632 | —                       | —                         | —                          |
| C12:0                  | 15.895 | 1.45±0.25 <sup>c</sup>  | 10.29±1.73 <sup>b</sup>   | 85.53±27.42 <sup>a</sup>   |
| C13:0                  | 17.089 | —                       | —                         | —                          |
| C14:1                  | 18.100 | 0.82±0.34 <sup>c</sup>  | 5.4±4.04 <sup>b</sup>     | 47.14±16.28 <sup>a</sup>   |
| C14:0                  | 18.221 | 4.98±0.93 <sup>c</sup>  | 39.88±11.26 <sup>b</sup>  | 289.4±87.74 <sup>a</sup>   |
| C15:1                  | 19.188 | —                       | —                         | —                          |
| C15:0                  | 19.299 | 0.58±0.25 <sup>c</sup>  | 3.06±0.98 <sup>b</sup>    | 12.12±4.94 <sup>a</sup>    |
| C16:1                  | 20.136 | 1.15±0.33 <sup>c</sup>  | 8.09±2.73 <sup>b</sup>    | 38.06±15.69 <sup>a</sup>   |
| C16:0                  | 20.339 | 1.15±0.33 <sup>c</sup>  | 137.61±38.77 <sup>b</sup> | 610.05±301.13 <sup>a</sup> |
| C17:1                  | 21.273 | 0.71±0.14 <sup>c</sup>  | 5.81±2.49 <sup>b</sup>    | 25.76±5.65 <sup>a</sup>    |
| C17:0                  | 21.514 | 0.50±0.10 <sup>c</sup>  | 3.67±1.26 <sup>b</sup>    | 15.00±5.64 <sup>a</sup>    |

|                        |        |                         |                           |                             |
|------------------------|--------|-------------------------|---------------------------|-----------------------------|
| C18:3                  | 22.288 | 10.09±2.15 <sup>c</sup> | 77.61±30.25 <sup>b</sup>  | 298.26±69.07 <sup>a</sup>   |
| C18:2n6t               | 22.511 | 5.99±2.01 <sup>c</sup>  | 38.73±15 <sup>b</sup>     | 219.49±69.39 <sup>a</sup>   |
| C18:2n6c               | 22.607 | 2.23±0.52 <sup>c</sup>  | 12.35±2.43 <sup>b</sup>   | 132.02±39.5 <sup>a</sup>    |
| C18:1                  | 22.680 | 5.48±1.91 <sup>c</sup>  | 37.90±11.40 <sup>b</sup>  | 223.71±59.03 <sup>a</sup>   |
| C18:0                  | 22.975 | 12.94±3.77 <sup>c</sup> | 114.35±39.01 <sup>b</sup> | 469.71±160.03 <sup>a</sup>  |
| C20:4n6                | 25.664 | 0.02±0.00 <sup>c</sup>  | 0.60±0.19 <sup>b</sup>    | 6.15±2.47 <sup>a</sup>      |
| C20:5n3                | 25.819 | —                       | —                         | —                           |
| C20:3n6/C20:3n3        | 26.07  | 1.02±0.49 <sup>c</sup>  | 6.27±1.69 <sup>b</sup>    | 46.51±14.48 <sup>a</sup>    |
| C20:2                  | 26.534 | 4.90±0.94 <sup>c</sup>  | 60.25±16.3 <sup>b</sup>   | 231.27±72.04 <sup>a</sup>   |
| C20:1                  | 26.665 | 0.49±0.19 <sup>c</sup>  | 2.61±0.81 <sup>b</sup>    | 9.05±3.5 <sup>a</sup>       |
| C20:0                  | 27.352 | 0.51±0.16 <sup>c</sup>  | 2.76±1.13 <sup>b</sup>    | 11.21±4.98 <sup>a</sup>     |
| C21:0                  | 30.708 | 0.79±0.23 <sup>c</sup>  | 4.10±1.04 <sup>b</sup>    | 17.05±5.46 <sup>a</sup>     |
| C22:6n3                | 31.666 | 0.35±0.16 <sup>c</sup>  | 2.02±0.91 <sup>b</sup>    | 9.90±4.81 <sup>a</sup>      |
| C22:2                  | 33.721 | 2.36±0.46 <sup>c</sup>  | 18.71±5.71 <sup>b</sup>   | 89.15±30.45 <sup>a</sup>    |
| C22:1n9                | 33.914 | —                       | —                         | —                           |
| C22:0                  | 35.22  | —                       | —                         | —                           |
| C23:0                  | 41.217 | 0.16±0.03 <sup>c</sup>  | 1.47±0.75 <sup>b</sup>    | 13.69±1.61 <sup>a</sup>     |
| C24:1                  | 44.554 | —                       | —                         | —                           |
| C24:0                  | 45.633 | —                       | —                         | —                           |
| Total free fatty acids |        | 61.23±4.65 <sup>c</sup> | 614.29±74.58 <sup>b</sup> | 3035.20±457.61 <sup>a</sup> |

### IF3

|                 |        |                         |                           |                            |
|-----------------|--------|-------------------------|---------------------------|----------------------------|
| C6:0            | 6.749  | 0.20±0.08 <sup>c</sup>  | 1.06±0.50 <sup>b</sup>    | 3.24±1.68 <sup>a</sup>     |
| C8:0            | 10.304 | 0.55±0.18 <sup>c</sup>  | 2.98±0.93 <sup>b</sup>    | 9.25±2.75 <sup>a</sup>     |
| C10:0           | 13.293 | 2.51±0.85 <sup>c</sup>  | 16.7±4.71 <sup>b</sup>    | 57.2±24.71 <sup>a</sup>    |
| C11:0           | 14.632 | 1.22±0.33 <sup>c</sup>  | 6.63±2.03 <sup>b</sup>    | 22.64±8.2 <sup>a</sup>     |
| C12:0           | 15.895 | 1.77±0.87 <sup>c</sup>  | 10.85±3.39 <sup>b</sup>   | 34.97±13.02 <sup>a</sup>   |
| C13:0           | 17.089 | —                       | —                         | —                          |
| C14:1           | 18.100 | 1.20±0.36 <sup>c</sup>  | 6.49±2.02 <sup>b</sup>    | 23.68±5.91 <sup>a</sup>    |
| C14:0           | 18.221 | 4.31±1.85 <sup>c</sup>  | 27.28±12.51 <sup>b</sup>  | 89.31±56.36 <sup>a</sup>   |
| C15:1           | 19.188 | —                       | —                         | —                          |
| C15:0           | 19.299 | —                       | —                         | —                          |
| C16:1           | 20.136 | 1.16±0.43 <sup>c</sup>  | 7.40±2.64 <sup>b</sup>    | 27.19±4.28 <sup>a</sup>    |
| C16:0           | 20.339 | 22.21±4.3 <sup>c</sup>  | 173.51±51.25 <sup>b</sup> | 588.76±145.43 <sup>a</sup> |
| C17:1           | 21.273 | 1.00±0.2 <sup>c</sup>   | 6.74±2.26 <sup>b</sup>    | 24.34±8.77 <sup>a</sup>    |
| C17:0           | 21.514 | 0.88±0.34 <sup>c</sup>  | 5.73±0.78 <sup>b</sup>    | 18.69±7.88 <sup>a</sup>    |
| C18:3           | 22.288 | 0.6±0.2 <sup>c</sup>    | 3.95±1.03 <sup>b</sup>    | 13.96±5.61 <sup>a</sup>    |
| C18:2n6t        | 22.511 | 1.83±0.69 <sup>c</sup>  | 10.4±3.17 <sup>b</sup>    | 37.03±14.87 <sup>a</sup>   |
| C18:2n6c        | 22.607 | 0.88±0.32 <sup>c</sup>  | 4.85±1.82 <sup>b</sup>    | 19.6±2.08 <sup>a</sup>     |
| C18:1           | 22.680 | 1.44±0.56 <sup>c</sup>  | 7.61±1.99 <sup>b</sup>    | 24.32±7.12 <sup>a</sup>    |
| C18:0           | 22.975 | 17.86±5.27 <sup>c</sup> | 174.98±48.33 <sup>b</sup> | 554.16±148.09 <sup>a</sup> |
| C20:4n6         | 25.664 | 0.44±0.16 <sup>c</sup>  | 2.80±0.95 <sup>b</sup>    | 10.97±2.07 <sup>a</sup>    |
| C20:5n3         | 25.819 | —                       | —                         | —                          |
| C20:3n6/C20:3n3 | 26.07  | 1.35±0.35 <sup>c</sup>  | 8.84±2.66 <sup>b</sup>    | 33.75±10.53 <sup>a</sup>   |
| C20:2           | 26.534 | 2.32±0.72 <sup>c</sup>  | 15.67±7.19 <sup>b</sup>   | 60.4±18.61 <sup>a</sup>    |

|                        |        |                         |                          |                             |
|------------------------|--------|-------------------------|--------------------------|-----------------------------|
| C20:1                  | 26.665 | 0.62±0.21 <sup>c</sup>  | 3.21±1.14 <sup>b</sup>   | 10.66±2.46 <sup>a</sup>     |
| C20:0                  | 27.352 | 0.69±0.19 <sup>c</sup>  | 4.62±0.95 <sup>b</sup>   | 14.54±4.92 <sup>a</sup>     |
| C21:0                  | 30.708 | 0.30±0.07 <sup>c</sup>  | 1.67±0.68 <sup>b</sup>   | 5.33±2.55 <sup>a</sup>      |
| C22:6n3                | 31.666 | 0.48±0.17 <sup>c</sup>  | 3.47±0.9 <sup>b</sup>    | 12.25±2.47 <sup>a</sup>     |
| C22:2                  | 33.721 | 3.46±1.79 <sup>c</sup>  | 22.76±5.63 <sup>b</sup>  | 84.45±24.78 <sup>a</sup>    |
| C22:1n9                | 33.914 | 0.90±0.23 <sup>c</sup>  | 8.17±2.74 <sup>b</sup>   | 70.97±23.94 <sup>a</sup>    |
| C22:0                  | 35.22  | —                       | —                        | —                           |
| C23:0                  | 41.217 | —                       | —                        | —                           |
| C24:1                  | 44.554 | 1.09±0.45 <sup>c</sup>  | 10.13±4.39 <sup>b</sup>  | 37.17±12.26 <sup>a</sup>    |
| C24:0                  | 45.633 | 0.02±0.01 <sup>c</sup>  | 0.47±0.2 <sup>b</sup>    | 2.78±1.13 <sup>a</sup>      |
| Total free fatty acids |        | 71.43±4.35 <sup>c</sup> | 549.13±47.4 <sup>b</sup> | 1891.74±234.22 <sup>a</sup> |

#### IF4

|                 |        |                         |                         |                           |
|-----------------|--------|-------------------------|-------------------------|---------------------------|
| C6:0            | 6.749  | 0.42±0.06 <sup>c</sup>  | 6.12±1.37 <sup>b</sup>  | 18.62±1.53 <sup>a</sup>   |
| C8:0            | 10.304 | 0.35±0.17 <sup>c</sup>  | 1.66±0.05 <sup>b</sup>  | 5.58±0.03 <sup>a</sup>    |
| C10:0           | 13.293 | 1.81±0.07 <sup>c</sup>  | 20.81±1.9 <sup>b</sup>  | 90.35±6.14 <sup>a</sup>   |
| C11:0           | 14.632 | 1.15±0.09 <sup>c</sup>  | 6.96±1.18 <sup>b</sup>  | 24.47±2.75 <sup>a</sup>   |
| C12:0           | 15.895 | 1.36±0.11 <sup>c</sup>  | 12.29±2.32 <sup>b</sup> | 43.19±9.14 <sup>a</sup>   |
| C13:0           | 17.089 | —                       | —                       | —                         |
| C14:1           | 18.100 | 1.04±0.17 <sup>c</sup>  | 10.49±3.13 <sup>b</sup> | 43.73±5.77 <sup>a</sup>   |
| C14:0           | 18.221 | 8.74±0.3 <sup>c</sup>   | 72.05±4.31 <sup>b</sup> | 310.27±27.63 <sup>a</sup> |
| C15:1           | 19.188 | —                       | —                       | —                         |
| C15:0           | 19.299 | —                       | —                       | —                         |
| C16:1           | 20.136 | —                       | —                       | —                         |
| C16:0           | 20.339 | 10.52±0.86 <sup>c</sup> | 67.53±2.32 <sup>b</sup> | 313.66±10.58 <sup>a</sup> |
| C17:1           | 21.273 | 1.36±0.26 <sup>c</sup>  | 12.49±0.34 <sup>b</sup> | 40.58±0.40 <sup>a</sup>   |
| C17:0           | 21.514 | —                       | 4.56±0.14 <sup>b</sup>  | 12.22±0.15 <sup>a</sup>   |
| C18:3           | 22.288 | 4.22±0.49 <sup>c</sup>  | 83.05±0.65 <sup>b</sup> | 294.46±2.67 <sup>a</sup>  |
| C18:2n6t        | 22.511 | 3.48±0.21 <sup>c</sup>  | 23.78±2.92 <sup>b</sup> | 120.81±5.09 <sup>a</sup>  |
| C18:2n6c        | 22.607 | 1.77±0.17 <sup>c</sup>  | 11.51±2.52 <sup>b</sup> | 52.92±4.27 <sup>a</sup>   |
| C18:1           | 22.680 | —                       | 41.47±2.77 <sup>b</sup> | 158.56±10.31 <sup>a</sup> |
| C18:0           | 22.975 | 6.74±0.35 <sup>c</sup>  | 34.35±2.71 <sup>b</sup> | 159.05±7.84 <sup>a</sup>  |
| C20:4n6         | 25.664 | —                       | 1.79±0.58 <sup>b</sup>  | 8.1±0.98 <sup>a</sup>     |
| C20:5n3         | 25.819 | —                       | —                       | —                         |
| C20:3n6/C20:3n3 | 26.07  | —                       | 8.29±0.19 <sup>b</sup>  | 32.79±0.19 <sup>a</sup>   |
| C20:2           | 26.534 | 2.07±0.13 <sup>c</sup>  | 47.83±3.54 <sup>b</sup> | 166.28±7.66 <sup>a</sup>  |
| C20:1           | 26.665 | —                       | 2.19±0.02 <sup>b</sup>  | 12.28±0.23 <sup>a</sup>   |
| C20:0           | 27.352 | 0.47±0.05 <sup>c</sup>  | 2.42±0.25 <sup>b</sup>  | 7.36±1.14 <sup>a</sup>    |
| C21:0           | 30.708 | —                       | 1.59±0.02 <sup>b</sup>  | 6.78±0.06 <sup>a</sup>    |
| C22:6n3         | 31.666 | 0.53±0.02 <sup>c</sup>  | 2.97±0.32 <sup>b</sup>  | 9.62±2.11 <sup>a</sup>    |
| C22:2           | 33.721 | 1.66±0.12 <sup>c</sup>  | 6.51±0.52 <sup>b</sup>  | 22.8±3.09 <sup>a</sup>    |
| C22:1n9         | 33.914 | —                       | —                       | —                         |
| C22:0           | 35.22  | —                       | —                       | —                         |
| C23:0           | 41.217 | —                       | —                       | —                         |
| C24:1           | 44.554 | —                       | —                       | —                         |

|                        |        |                         |                           |                             |
|------------------------|--------|-------------------------|---------------------------|-----------------------------|
| C24:0                  | 45.633 | —                       | —                         | —                           |
| Total free fatty acids |        | 47.69±2.74 <sup>c</sup> | 482.71±33.49 <sup>b</sup> | 1954.48±109.76 <sup>a</sup> |
| <b>IF5</b>             |        |                         |                           |                             |
| C6:0                   | 6.749  | 0.12±0.04 <sup>c</sup>  | 1.16±0.25 <sup>b</sup>    | 6.45±1.45 <sup>a</sup>      |
| C8:0                   | 10.304 | 0.57±0.24 <sup>c</sup>  | 3.22±0.83 <sup>b</sup>    | 19.23±2.12 <sup>a</sup>     |
| C10:0                  | 13.293 | 0.84±0.23 <sup>c</sup>  | 5.2±0.87 <sup>b</sup>     | 27.71±6.13 <sup>a</sup>     |
| C11:0                  | 14.632 | 0.95±0.20 <sup>c</sup>  | 4.93±0.66 <sup>b</sup>    | 15.32±3.5 <sup>a</sup>      |
| C12:0                  | 15.895 | 1.03±0.32 <sup>c</sup>  | 5.26±1.12 <sup>b</sup>    | 53.57±6.36 <sup>a</sup>     |
| C13:0                  | 17.089 | —                       | —                         | —                           |
| C14:1                  | 18.100 | 0.89±0.4 <sup>c</sup>   | 5.41±1.42 <sup>b</sup>    | 31.01±3.70 <sup>a</sup>     |
| C14:0                  | 18.221 | 5.39±0.78 <sup>c</sup>  | 32.01±4.14 <sup>b</sup>   | 128.65±31.9 <sup>a</sup>    |
| C15:1                  | 19.188 | —                       | —                         | —                           |
| C15:0                  | 19.299 | 0.57±0.23 <sup>c</sup>  | 3.04±0.51 <sup>b</sup>    | 9.26±2.09 <sup>a</sup>      |
| C16:1                  | 20.136 | —                       | —                         | —                           |
| C16:0                  | 20.339 | 1.38±0.46 <sup>c</sup>  | 103.46±3.43 <sup>b</sup>  | 382.68±42.95 <sup>a</sup>   |
| C17:1                  | 21.273 | —                       | 5.01±0.07 <sup>b</sup>    | 26.71±0.42 <sup>a</sup>     |
| C17:0                  | 21.514 | 0.36±0.08 <sup>c</sup>  | 1.88±0.6 <sup>b</sup>     | 6.18±1.19 <sup>a</sup>      |
| C18:3                  | 22.288 | —                       | 4.07±0.04 <sup>b</sup>    | 17.29±0.12 <sup>a</sup>     |
| C18:2n6t               | 22.511 | 1.75±0.53 <sup>c</sup>  | 15.39±1.23 <sup>b</sup>   | 105.48±19.48 <sup>a</sup>   |
| C18:2n6c               | 22.607 | 0.68±0.14 <sup>c</sup>  | 4.36±1.33 <sup>b</sup>    | 70.48±8.17 <sup>a</sup>     |
| C18:1                  | 22.680 | 0.37±0.10 <sup>c</sup>  | 6.96±0.64 <sup>b</sup>    | 26.95±4.55 <sup>a</sup>     |
| C18:0                  | 22.975 | 10.53±2.46 <sup>c</sup> | 76.35±4.32 <sup>b</sup>   | 294.48±32.4 <sup>a</sup>    |
| C20:4n6                | 25.664 | —                       | 1.02±0.03 <sup>b</sup>    | 6.20±0.09 <sup>a</sup>      |
| C20:5n3                | 25.819 | —                       | —                         | —                           |
| C20:3n6/C20:3n3        | 26.07  | —                       | 6.29±0.04 <sup>b</sup>    | 23.52±0.72 <sup>a</sup>     |
| C20:2                  | 26.534 | 0.04±0.01 <sup>c</sup>  | 0.74±0.15 <sup>b</sup>    | 12.02±2.41 <sup>a</sup>     |
| C20:1                  | 26.665 | —                       | 1.74±0.04 <sup>b</sup>    | 11.31±0.22 <sup>a</sup>     |
| C20:0                  | 27.352 | 0.49±0.11 <sup>c</sup>  | 2.55±0.75 <sup>b</sup>    | 8.61±1.07 <sup>a</sup>      |
| C21:0                  | 30.708 | —                       | 1.21±0.02 <sup>b</sup>    | 3.21±0.03 <sup>a</sup>      |
| C22:6n3                | 31.666 | 0.21±0.07 <sup>c</sup>  | 1.15±0.24 <sup>b</sup>    | 4.43±0.78 <sup>a</sup>      |
| C22:2                  | 33.721 | 0.47±0.06 <sup>c</sup>  | 2.83±0.39 <sup>b</sup>    | 17.08±1.46 <sup>a</sup>     |
| C22:1n9                | 33.914 | —                       | —                         | —                           |
| C22:0                  | 35.22  | —                       | —                         | —                           |
| C23:0                  | 41.217 | —                       | —                         | —                           |
| C24:1                  | 44.554 | —                       | —                         | —                           |
| C24:0                  | 45.633 | —                       | —                         | —                           |
| Total free fatty acids |        | 26.64±6.46 <sup>c</sup> | 295.24±22.99 <sup>b</sup> | 1307.83±173.31 <sup>a</sup> |
| <b>Human milk</b>      |        |                         |                           |                             |
| C6:0                   | 6.749  | —                       | 1.44±0.57 <sup>b</sup>    | 6.40±1.68 <sup>a</sup>      |
| C8:0                   | 10.304 | 0.66±0.15 <sup>c</sup>  | 4.70±0.87 <sup>b</sup>    | 15.2±2.96 <sup>a</sup>      |
| C10:0                  | 13.293 | 0.79±0.20 <sup>c</sup>  | 19.63±2.85 <sup>b</sup>   | 82.29±10.22 <sup>a</sup>    |
| C11:0                  | 14.632 | —                       | —                         | 0.21±0.06 <sup>a</sup>      |
| C12:0                  | 15.895 | 5.24±0.85 <sup>c</sup>  | 76.42±5.22 <sup>b</sup>   | 275.18±92.97 <sup>a</sup>   |
| C13:0                  | 17.089 | —                       | 0.26±0.06 <sup>b</sup>    | 1.07±0.18 <sup>a</sup>      |

|                        |        |                         |                           |                            |
|------------------------|--------|-------------------------|---------------------------|----------------------------|
| C14:1                  | 18.100 | —                       | 0.11±0.01 <sup>b</sup>    | 0.63±0.17 <sup>a</sup>     |
| C14:0                  | 18.221 | 2.71±0.42 <sup>c</sup>  | 55.29±8.48 <sup>b</sup>   | 204.01±35.28 <sup>a</sup>  |
| C15:1                  | 19.188 | —                       | —                         | —                          |
| C15:0                  | 19.299 | 0.25±0.03 <sup>c</sup>  | 1.37±0.2 <sup>b</sup>     | 4.44±1.17 <sup>a</sup>     |
| C16:1                  | 20.136 | —                       | 4.57±0.82 <sup>b</sup>    | 45.14±7.80 <sup>a</sup>    |
| C16:0                  | 20.339 | 19.7±2.76 <sup>c</sup>  | 80.23±7.78 <sup>b</sup>   | 181.79±29.89 <sup>a</sup>  |
| C17:1                  | 21.273 | 0.22±0.02 <sup>c</sup>  | 1.19±0.11 <sup>b</sup>    | 5.81±1.3 <sup>a</sup>      |
| C17:0                  | 21.514 | 0.12±0.02 <sup>c</sup>  | 1.65±0.37 <sup>b</sup>    | 8.21±0.79 <sup>a</sup>     |
| C18:3                  | 22.288 | 1.2±0.24 <sup>c</sup>   | 14.64±3.26 <sup>b</sup>   | 53.59±11.36 <sup>a</sup>   |
| C18:2n6t               | 22.511 | —                       | —                         | —                          |
| C18:2n6c               | 22.607 | 24.11±2.76 <sup>c</sup> | 181.54±13.02 <sup>b</sup> | 948.81±117.84 <sup>a</sup> |
| C18:1                  | 22.680 | 20.84±4.18 <sup>c</sup> | 79.56±15.65 <sup>b</sup>  | 406.66±61.67 <sup>a</sup>  |
| C18:0                  | 22.975 | 5.63±0.55 <sup>c</sup>  | 19.66±3.52 <sup>b</sup>   | 84.64±12.99 <sup>a</sup>   |
| C20:4n6                | 25.664 | 0.36±0.07 <sup>c</sup>  | 2.88±0.68 <sup>b</sup>    | 10.4±1.86 <sup>a</sup>     |
| C20:5n3                | 25.819 | 0.15±0.02 <sup>c</sup>  | 1.37±0.27 <sup>b</sup>    | 4.75±0.89 <sup>a</sup>     |
| C20:3n6/C20:3n3        | 26.07  | 0.11±0.02 <sup>c</sup>  | 0.36±0.11 <sup>b</sup>    | 1.94±0.48 <sup>a</sup>     |
| C20:2                  | 26.534 | 0.34±0.13 <sup>c</sup>  | 2.72±0.74 <sup>b</sup>    | 9.37±1.15 <sup>a</sup>     |
| C20:1                  | 26.665 | 0.14±0.01 <sup>c</sup>  | 1.51±0.22 <sup>b</sup>    | 6.19±0.53 <sup>a</sup>     |
| C20:0                  | 27.352 | 0.13±0.02 <sup>c</sup>  | 0.65±0.11 <sup>b</sup>    | 3.41±0.62 <sup>a</sup>     |
| C21:0                  | 30.708 | —                       | 0.42±0.05 <sup>b</sup>    | 1.73±0.71 <sup>a</sup>     |
| C22:6n3                | 31.666 | 0.20±0.05 <sup>c</sup>  | 2.14±0.64 <sup>b</sup>    | 8.04±1.39 <sup>a</sup>     |
| C22:2                  | 33.721 | 0.13±0.01 <sup>c</sup>  | 0.52±0.06 <sup>b</sup>    | 1.93±0.42 <sup>a</sup>     |
| C22:1n9                | 33.914 | —                       | 0.54±0.16 <sup>b</sup>    | 1.9±0.59 <sup>a</sup>      |
| C22:0                  | 35.22  | —                       | 0.4±0.04 <sup>b</sup>     | 1.7±0.25 <sup>a</sup>      |
| C23:0                  | 41.217 | —                       | 0.22±0.07 <sup>b</sup>    | 1.18±0.11 <sup>a</sup>     |
| C24:1                  | 44.554 | —                       | 0.39±0.09 <sup>b</sup>    | 1.59±0.39 <sup>a</sup>     |
| C24:0                  | 45.633 | —                       | 0.43±0.14 <sup>b</sup>    | 2.02±0.44 <sup>a</sup>     |
| Total free fatty acids |        | 83.12±7.31 <sup>c</sup> | 556.94±54.84 <sup>b</sup> | 2380.38±94.28 <sup>a</sup> |

<sup>a-c</sup> Values with different superscripts differ significantly with respect to different digestive stage ( $p < 0.05$ ).

IF1: vegetable oil-based formula; IF2: vegetable oil-based formula with MFGM; IF3: bovine milk/vegetable oil-based formula with cream; IF4 bovine milk/vegetable oil-based formula with cream and soybean phospholipid; IF5: whole fat milk powder /vegetable oil-based formula.
